# Supplementary material for: Declining water resources in response to global warming and changes in atmospheric circulation patterns over southern Mediterranean France
Source: Copernicus journal article supplement (doi:10.5194/hess-26-6055-2022), 2022-12-05
Supplement: Supplementary file 1 [file hess-26-6055-2022-supplement.zip]

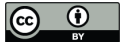

*Supplement of*

**Declining water resources in response to global warming and changes in atmospheric circulation patterns over southern Mediterranean France**

**Camille Labrousse et al.**

*Correspondence to:* Camille Labrousse ([camille.m.labrousse@gmail.com](mailto:camille.m.labrousse@gmail.com), [camillem@post.bgu.ac.il](mailto:camillem@post.bgu.ac.il))

- [hess-26-6055-2022-supplement-title-page.pdf](#)
- [Supplement.pdf](#)
- data and code
  - code
    - \* [code\\_Qmod.txt](#)
    - \* [code\\_kmeans\\_and\\_wavelet.txt](#)
  - data
    - \* [Q\\_monthly\\_1959\\_2018.txt](#)
    - \* [TPs](#)
    - \* [data.summary.pdf](#)

The copyright of individual parts of the supplement might differ from the article licence.
