# Supplementary material for: Declining water resources in response to global warming and changes in atmospheric circulation patterns over southern Mediterranean France
Source: Copernicus journal article supplement (doi:10.5194/hess-26-6055-2022), 2022-12-05
Supplement: Supplementary file 2 [file hess-26-6055-2022-supplement.zip]

Supplementary Materials

Table S 1 : Significant (p < 0.05) local maxima of average wavelet power of RDI03 and Q, NAO, SCAND, MO, and WeMO

| Variable   | Period (years)   | Average power | Pv    |
|------------|------------------|---------------|-------|
| East-RDI03 | 0.7-1.2 (1.0)    | 15.21         | <0.01 |
| East-Q     | 0.7-3.0 (1.0)    | 5             | <0.01 |
|            | 3.0-6.0 (3.0)    | 0.68          | 0.03  |
|            | 6.0-9.0 (8.4)    | 0.6           | <0.01 |
|            | 9.0-15.0 (9.3)   | 0.51          | 0.02  |
| West-RDI03 | 0.7-1.2 (1.0)    | 16.87         | <0.01 |
| West-Q     | 0.7-3 (1.0)      | 6.17          | <0.01 |
|            | 3.0-6.0 (4.3)    | 1.06          | <0.01 |
|            | 12.0-14.0 (14.0) | 0.36          | 0.01  |
| NAO        | 0.5-2.0 (0.5)    | 2.52          | 0.01  |
|            | 2.0-3.0 (2.4)    | 0.83          | 0.01  |
|            | 11.0-16.0 (13.6) | 0.21          | 0.01  |
| SCAND      | 0.5-1.7 (0.7)    | 2.09          | 0.02  |
|            | 0.8-10.0 (8.7)   | 0.27          | <0.01 |
| MO         | 0.4-1.2 (1)      | 5.87          | <0.01 |
| WeMO       | 0.9-1.3 (1)      | 1.64          | 0.01  |
|            | 10.0-20.0 (18)   | 0.39          | 0.02  |

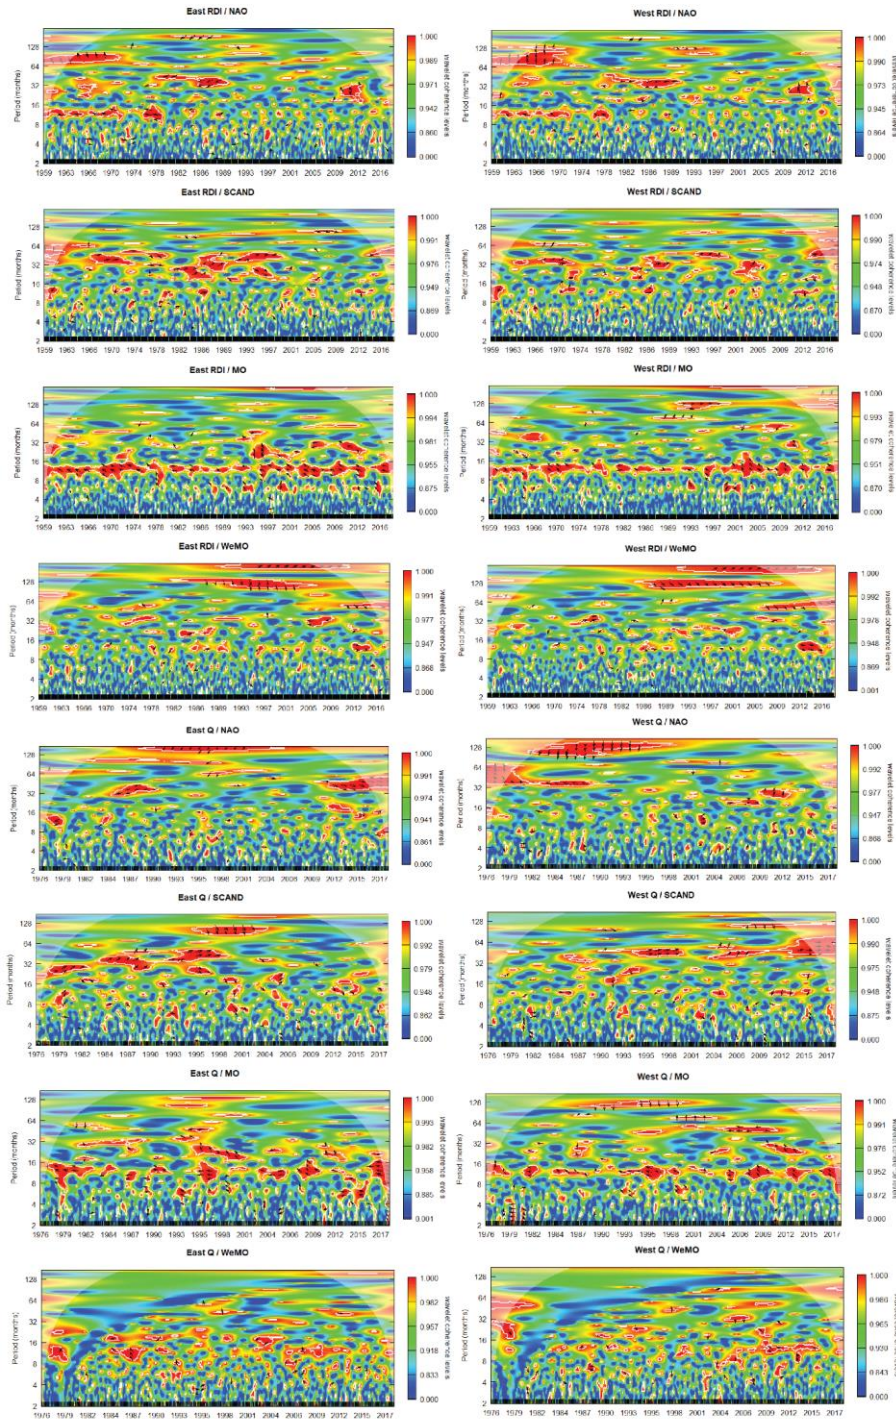

5 **Figure S 1 : Cross wavelet coherence of RDI03 and Q for each cluster and NAO, Scand, MO, and WeMO. White lines indicate the 5% significance level. Parallel black arrows indicate coherence; arrows pointing exactly to the right indicate that the two series are in phase at the respective period, arrows pointing to the left indicate an opposite in phase behaviour**

**Table S 2 : Significant ( $p < 0.05$ ) local maxima of average cross wavelet coherence of RDI03 and Q, NAO, SCAND, MO, and WeMO**

| Cluster | Variable    | Period (months)   | Average power | Pv    |
|---------|-------------|-------------------|---------------|-------|
| East    | NAO-Q       | 6                 | 0.92          | 0.04  |
|         | SCAND-Q     | 6.0-9.0 (8.6)     | 0.95          | 0.02  |
|         |             | 11.5-13.5 (13)    | 0.96          | <0.01 |
|         |             | 20.0-21.2 (21)    | 0.97          | 0.01  |
|         | MO-Q        | 2.5-6.5 (6)       | 0.95          | <0.01 |
|         |             | 10.5-14.0 (12)    | 0.99          | <0.01 |
|         |             | 19                | 0.96          | 0.02  |
|         |             | 35.5              | 0.97          | 0.03  |
|         | WeMO-Q      | 11.0-12.5(12)     | 0.96          | <0.01 |
|         | NAO-RDI03   | 2                 | 0.87          | 0.03  |
|         |             | 5.5-6.5 (6)       | 0.93          | <0.01 |
|         |             | 10.0-14.0 (13)    | 0.96          | 0.01  |
|         |             | 31                | 0.96          | 0.02  |
|         |             | 66.0-68.5(68.5)   | 0.98          | 0.02  |
|         |             | 71                | 0.98          | 0.03  |
|         | SCAND-RDI03 | 2.0-2.5(2)        | 0.89          | <0.01 |
|         |             | 5.5-6.5(6)        | 0.93          | <0.01 |
|         |             | 11.0-13.5(13)     | 0.97          | <0.01 |
|         |             | 20.0-22.0(21)     | 0.96          | 0.02  |
|         |             | 31.0-34.0(32)     | 0.97          | 0.01  |
|         |             | 49                | 0.97          | 0.04  |
|         | MO-RDI03    | 100               | 0.98          | 0.04  |
|         |             | 2                 | 0.89          | 0.01  |
|         |             | 5.0-6.7(6)        | 0.96          | <0.01 |
|         |             | 9.5-14.5(12)      | 1             | <0.01 |
|         | WeMO-RDI03  | 31.0-33.0(32)     | 0.98          | <0.01 |
|         |             | 2                 | 0.88          | <0.01 |
|         |             | 5.0-6.5(6)        | 0.86          | <0.01 |
|         |             | 9.5-14.5(12)      | 0.99          | <0.01 |
|         |             | 32                | 0.96          | 0.01  |
|         |             | 128               | 0.98          | 0.03  |
| West    | NAO-Q       | 5.8-6.3 (6.0)     | 0.92          | 0.03  |
|         |             | 10.0-11.0 (10.6)  | 0.94          | 0.03  |
|         |             | 73.0-76.2 (73.5)  | 0.98          | 0.04  |
|         | SCAND-Q     | 6.5               | 0.92          | 0.05  |
|         |             | 11.0-13.5 (13)    | 0.97          | 0.01  |
|         |             | 21                | 0.95          | 0.05  |
|         |             | 42.0-44.0 (44)    | 0.98          | 0.02  |
|         |             | 104.0-108.0 (108) | 0.99          | 0.04  |
|         | MO-Q        | 5.5-6.3 (6)       | 0.94          | <0.01 |
|         |             | 10.0-14.0 (12)    | 1             | <0.01 |
|         |             | 76                | 0.98          | 0.05  |
|         | WeMO-Q      | 6                 | 0.91          | 0.04  |
|         |             | 11.0-13.0 (12)    | 0.96          | <0.01 |

|  |             |               |      |       |
|--|-------------|---------------|------|-------|
|  |             | 18            | 0.95 | 0.02  |
|  | NAO-RDI03   | 6             | 0.91 | 0.03  |
|  |             | 10.0-14.0(13) | 0.96 | 0.01  |
|  |             | 21.0-23.0(22) | 0.96 | 0.02  |
|  |             | 35.5-38.0(38) | 0.97 | 0.03  |
|  |             | 128           | 0.98 | 0.05  |
|  | SCAND-RDI03 | 2.0-2.5(2)    | 0.89 | <0.01 |
|  |             | 6.0-6.5(6.0)  | 0.93 | <0.01 |
|  |             | 11.0-13.5(13) | 0.97 | <0.01 |
|  |             | 31.0-32.0(32) | 0.97 | 0.03  |
|  | MO-RDI03    | 2.0-2.5(2)    | 0.88 | 0.02  |
|  |             | 4.0-6.5(6)    | 0.96 | <0.01 |
|  |             | 9.5-14.5(12)  | 1    | <0.01 |
|  |             | 32.0-33.0(32) | 0.96 | 0.04  |
|  | WeMO-RDI03  | 2.0-2.5(2)    | 0.88 | <0.01 |
|  |             | 5.0-6.5(6)    | 0.96 | <0.01 |
|  |             | 9.5-14.5(12)  | 1    | <0.01 |
|  |             | 32            | 0.96 | 0.04  |
|  |             | 128           | 0.98 | 0.03  |

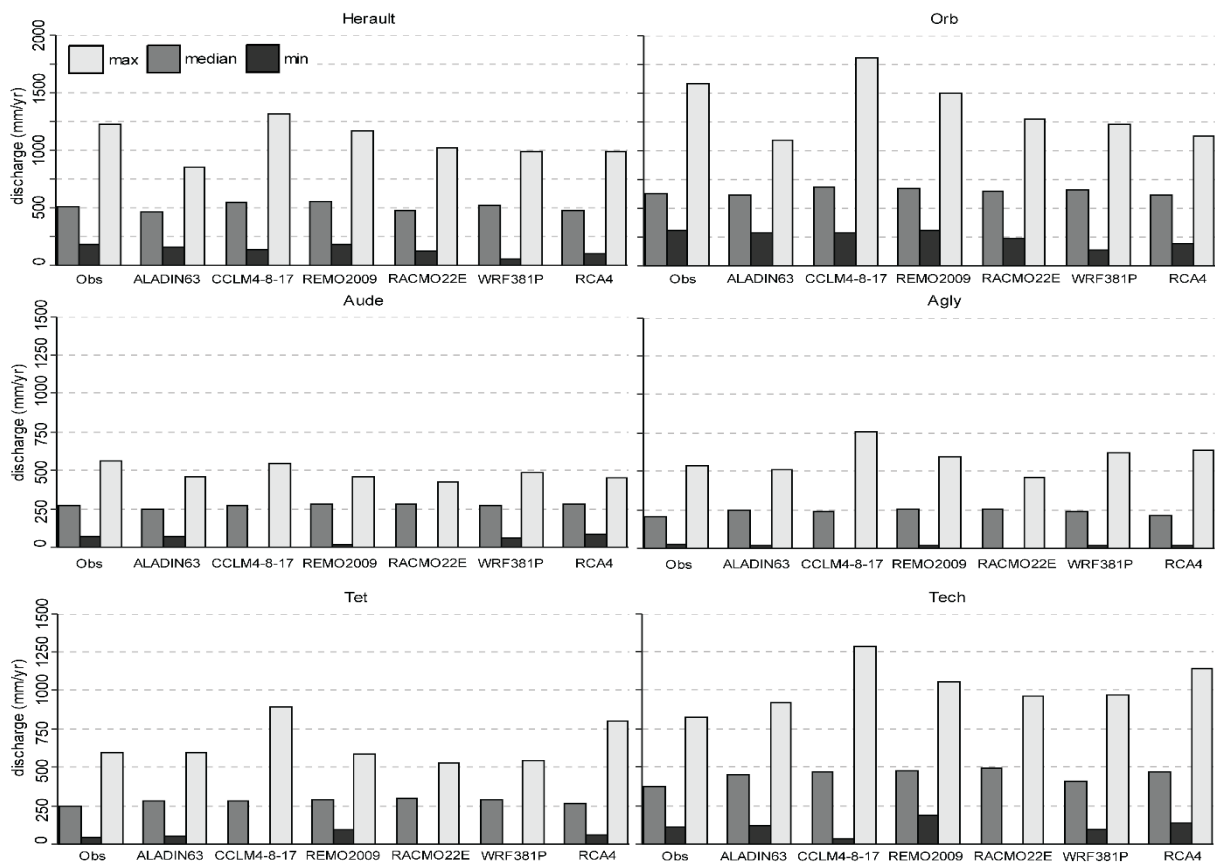

**Figure S 2: Comparison of the statistical characteristics of the simulated water discharge series for the period 1959-2005 obtained from RCMs and from Safran's variables (Obs). Light, mid, and dark grey bars are the maximum (max), median, and minimum (min), respectively, obtained throughout the series**

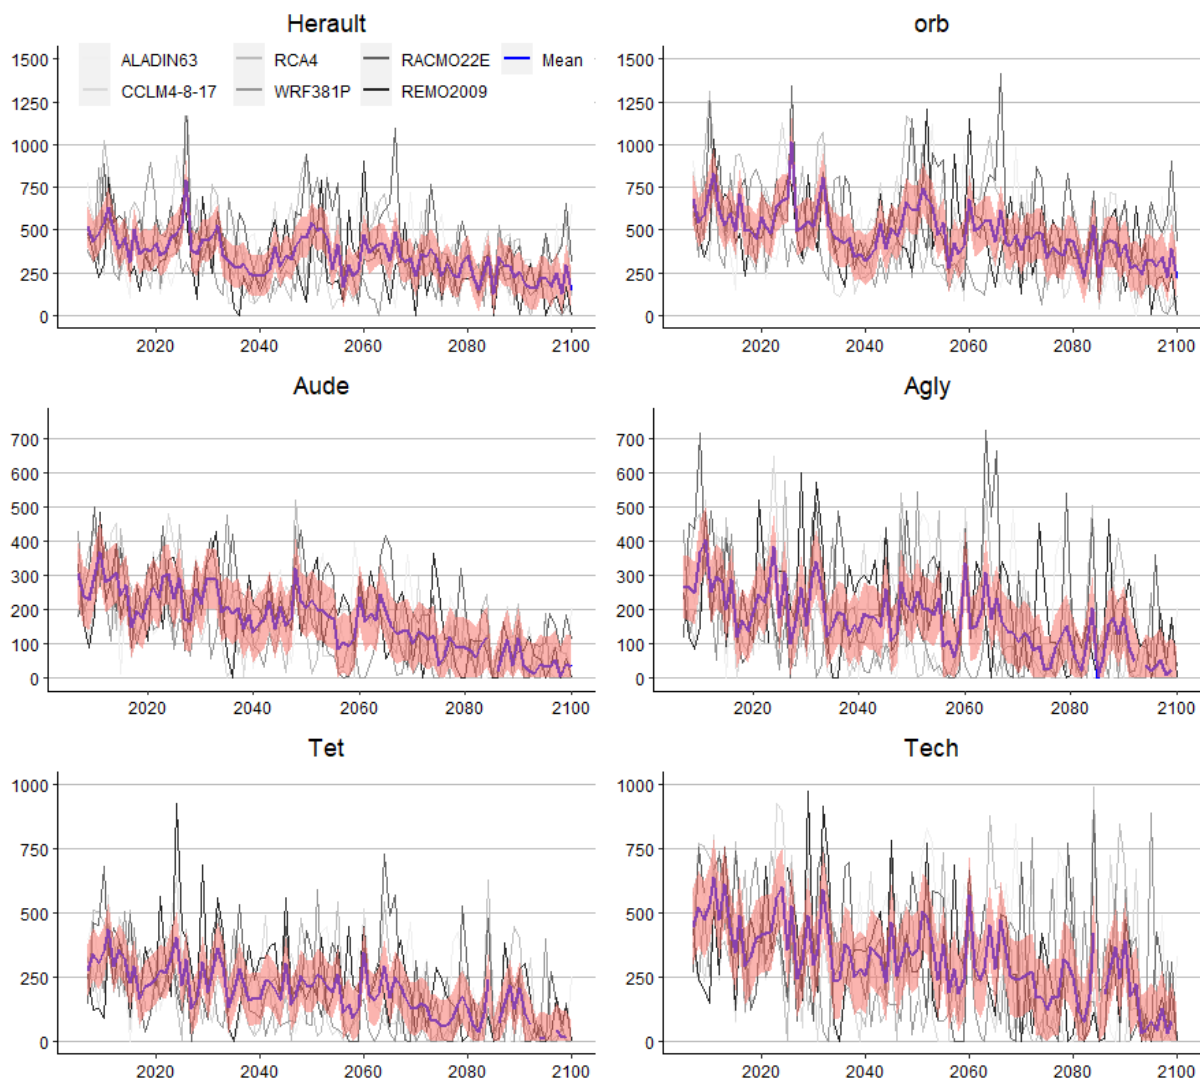

15 **Figure S 3: Annual Qmod on the period 2006-2100 for each RCMs. Blue line shows the ensemble mean series (Mean), and pink shade is the associated standard deviation error**



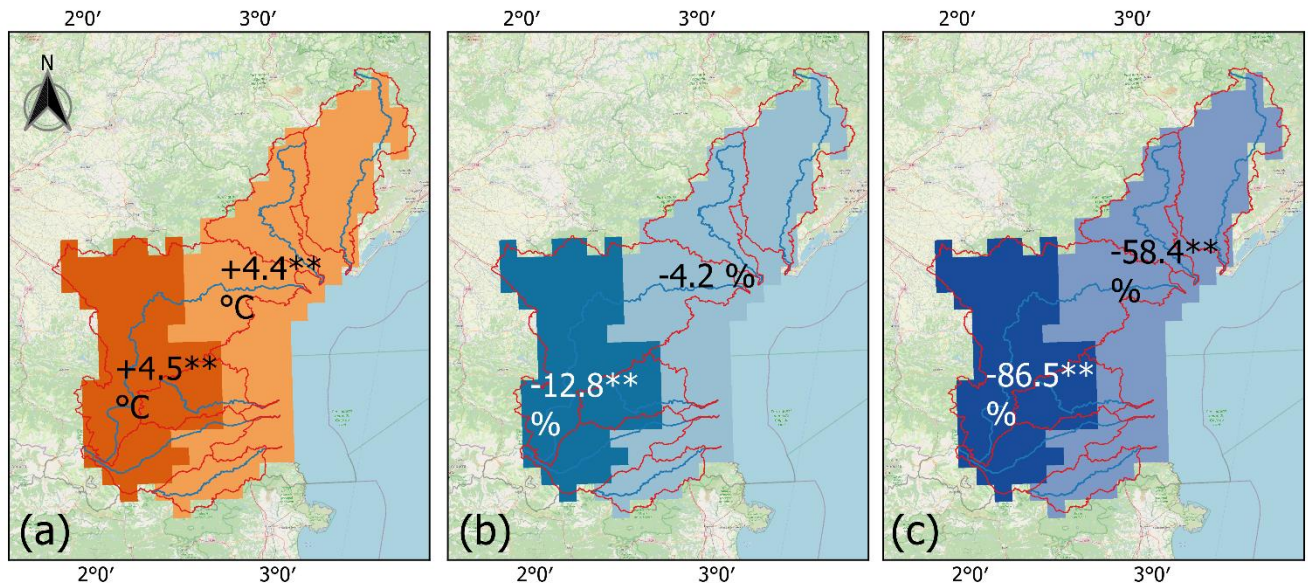

**Figure S 4: Cluster-wise linear trends for projected annual hydro-climatic variables under a scenario RCP 8.5 and for the period 2006-2100. Results are shown for the ensemble-mean of the 6 RCMs used in this study (a) temperature in °C (b) precipitation in % and (c) water discharge in %. Map data: © OpenStreetMap contributors 2021. Distributed under the Open Data Commons Open Database License (ODbL) v1.0.**
