# Supplementary material for: Declining water resources in response to global warming and changes in atmospheric circulation patterns over southern Mediterranean France
Source: Copernicus journal article supplement (doi:10.5194/hess-26-6055-2022), 2022-12-05
Supplement: Supplementary file 3 [file hess-26-6055-2022-supplement.zip]

Data of temperature and precipitation for the historical period were made available by the French Meteorological Survey Meteo France but are not publicly accessible.

Data of water discharge are summarized in one of the text files that we provide and is called Q\_monthly\_1959\_2018

Data of historical values of the major atmospheric teleconnection patterns that we used are summarized in a text file for each. All of them can be found in the folder called TPs which is attached in this mail.

Climate projections data of temperature, precipitation and sea level pressure are available at this reference **DOI: 10.24381/cds.9d44a987**
